# Supplementary material for: Endothelial Jak3 expression enhances pro-hematopoietic angiocrine function in mice
Source: PubMed Central journal article supplement (PMC7994450; doi:10.1038/s42003-021-01846-3), 2021-03-25
Supplement: 42003_2021_1846_MOESM2_ESM.pdf [file 42003_2021_1846_MOESM2_ESM.pdf]

## Description of Additional Supplementary Files

**File name:** Supplementary Data 1

**Description:** Bulk RNA sequencing data for WT endothelial cells in various tissues.

**File name:** Supplementary Data 2

**Description:** Bulk RNA sequencing data for *Jak3* KO and WT endothelial cells in lung and bone marrow.

**File name:** Supplementary Data 3

**Description:** Source data for Figures 2d, 3, and 4; and Supplementary Figures 1d, 8, and 9.
